# Supplementary material for: Development of Resistance to Pyrethroid in Culex pipiens pallens Population under Different Insecticide Selection Pressures
Source: PubMed Central journal article supplement (PMC4537097; doi:10.1371/journal.pntd.0003928), 2015-08-14

(A)

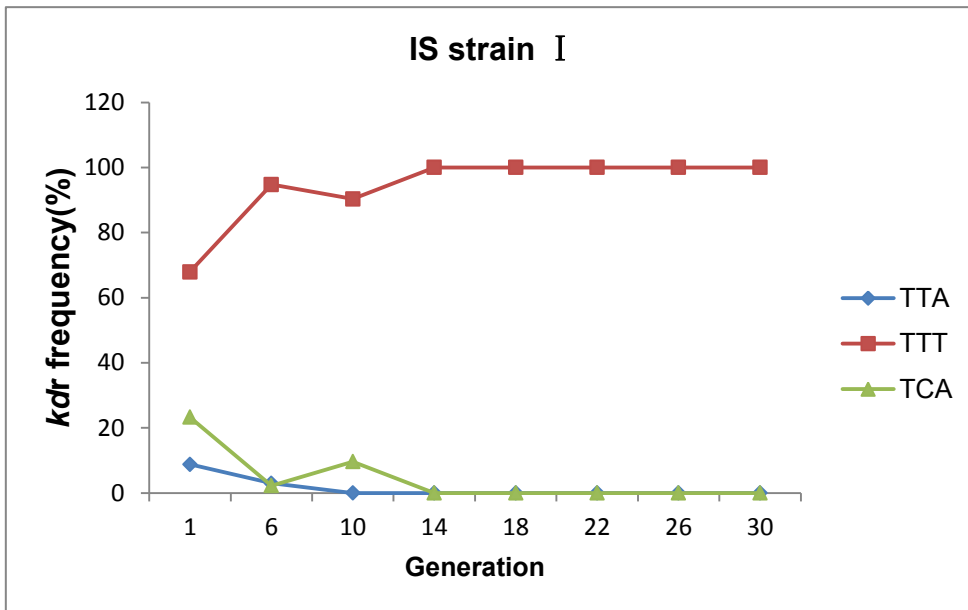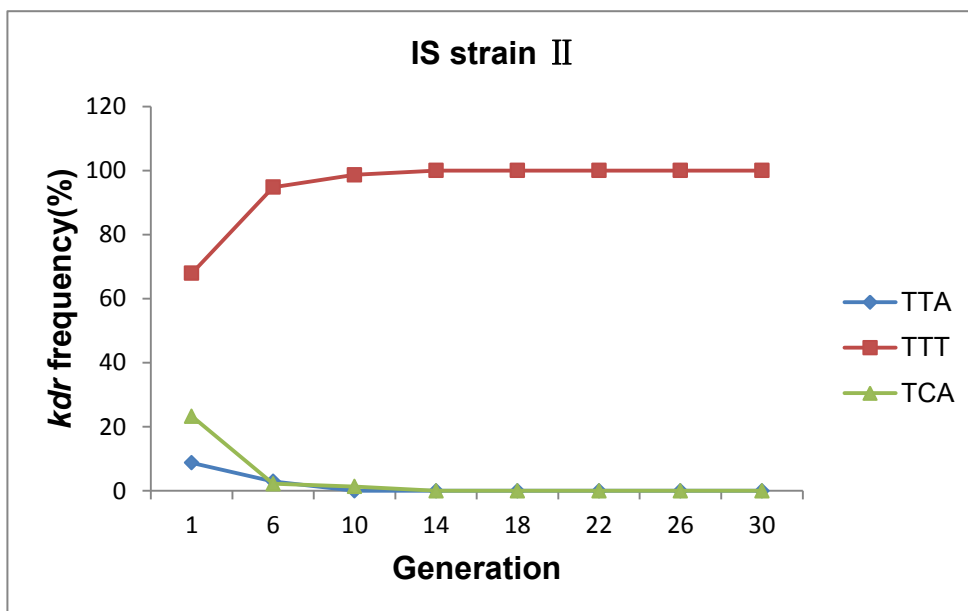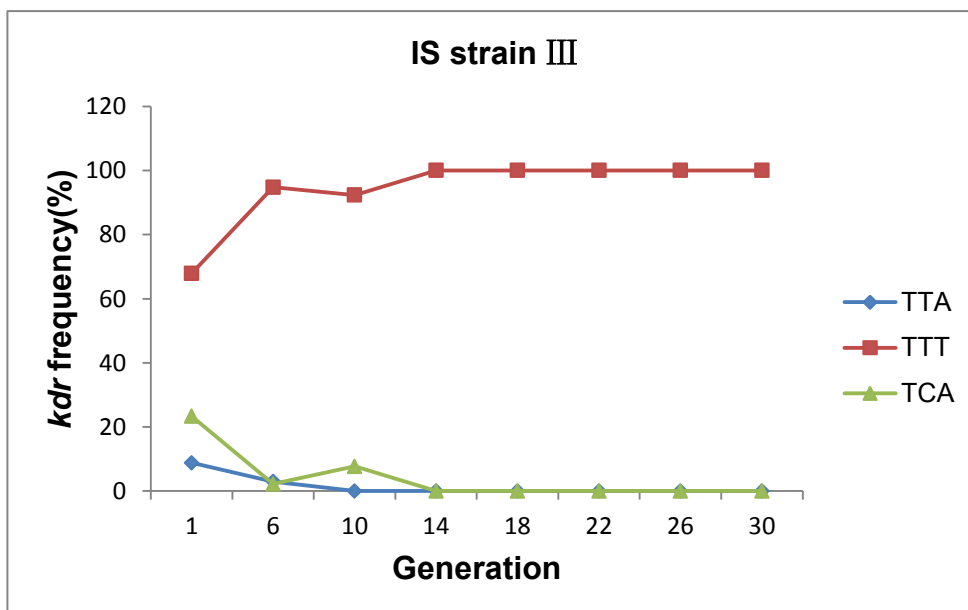

(B)

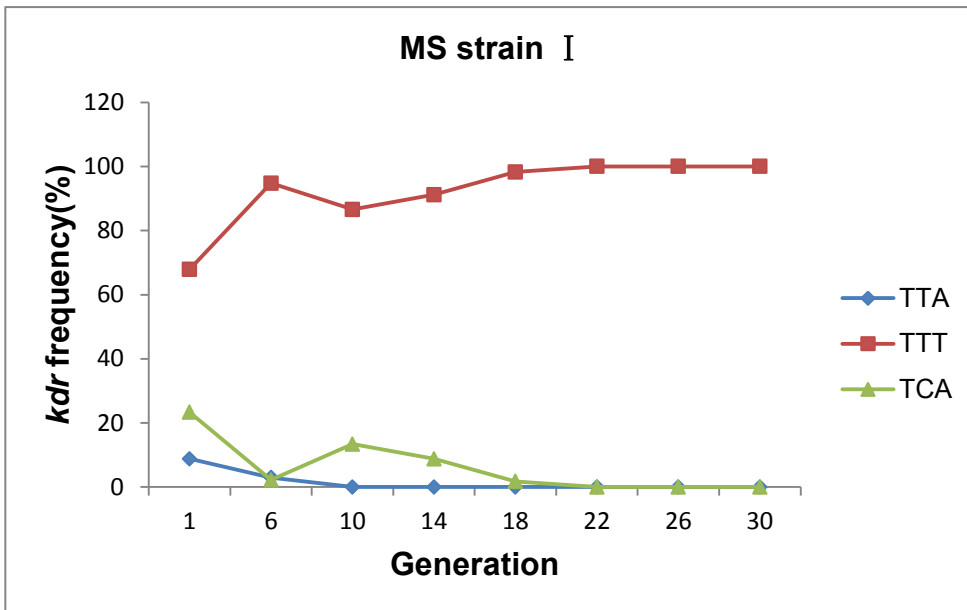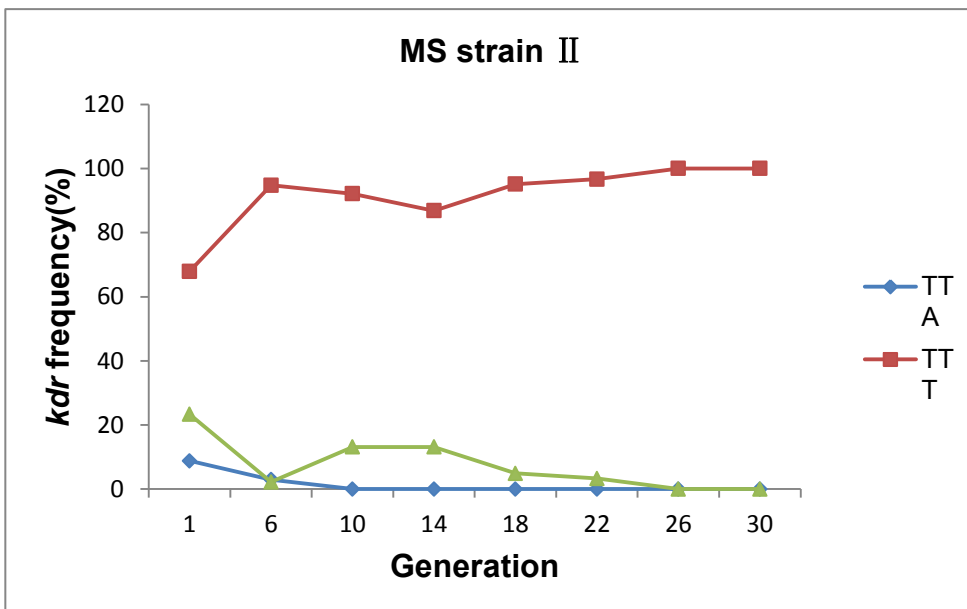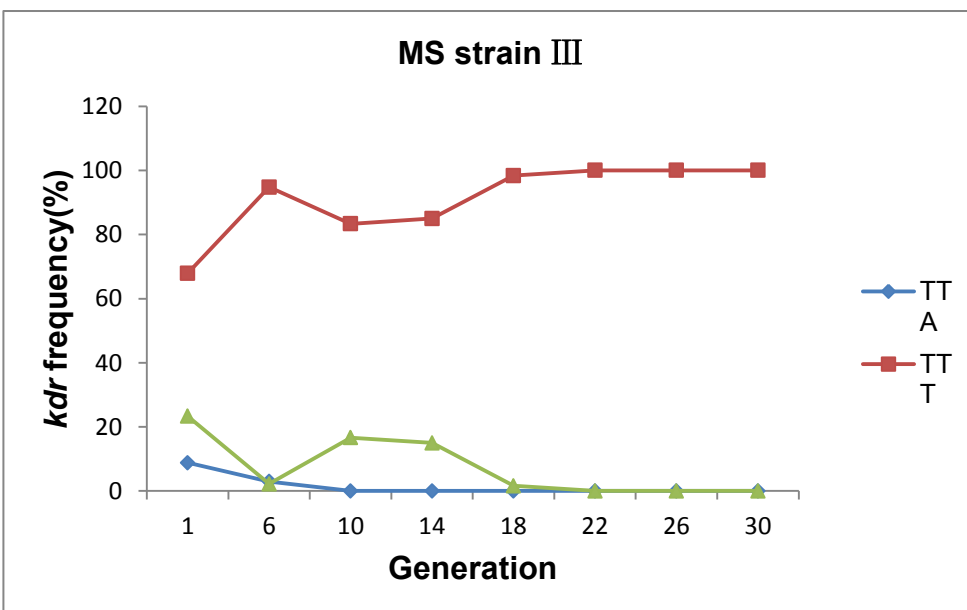

(C)

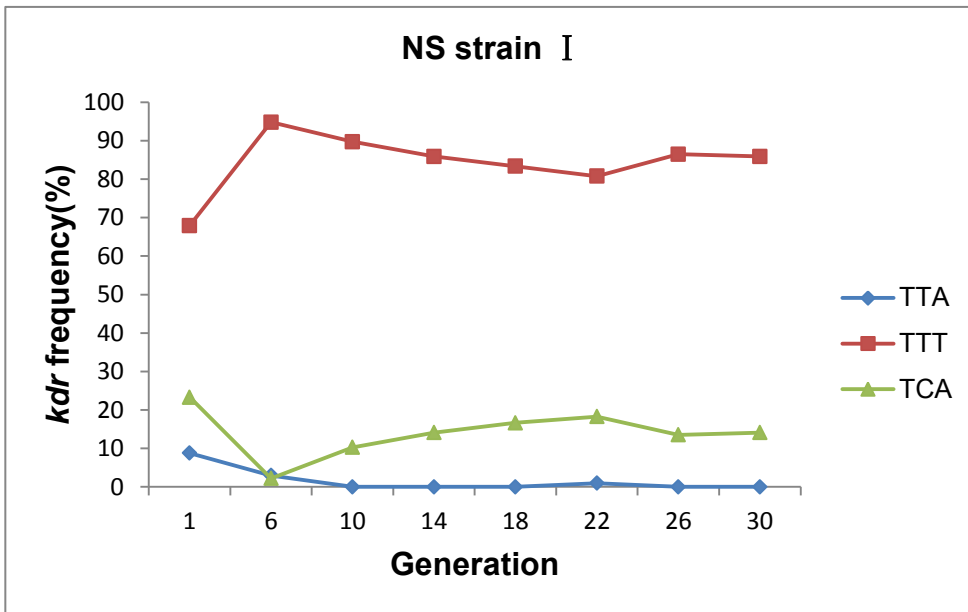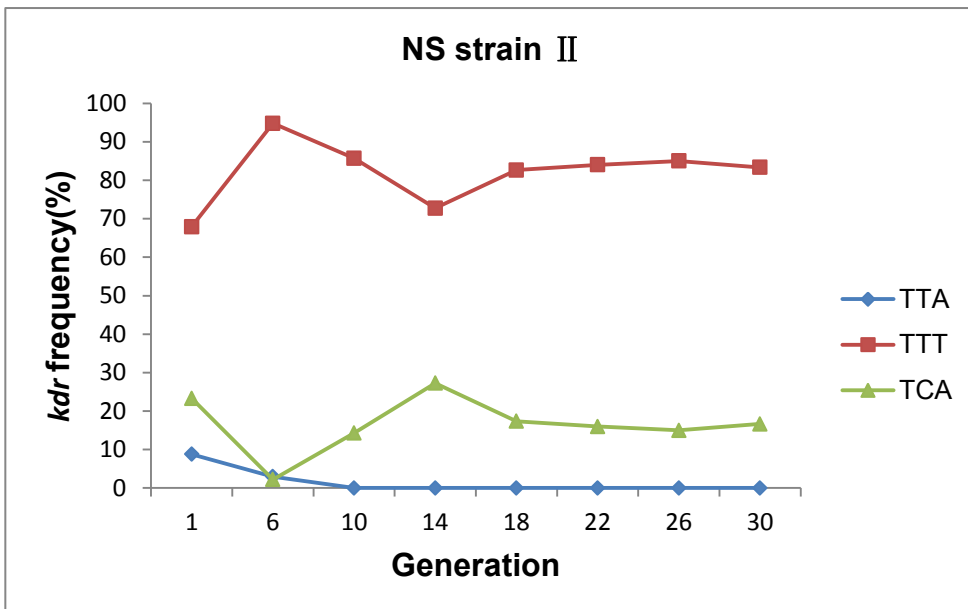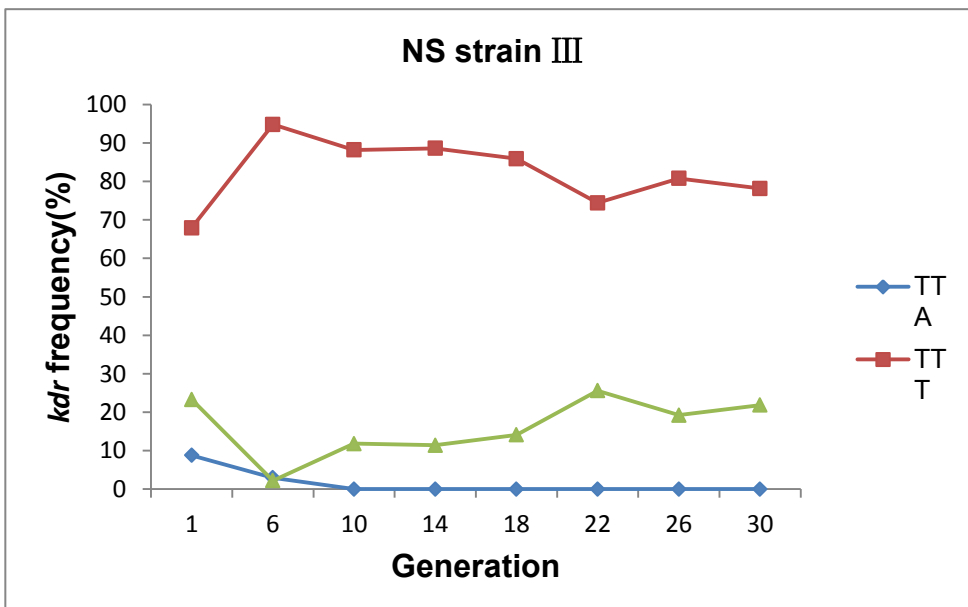

Supplement: pntd.0003928.s001.pdf [file pntd.0003928.s001.pdf]
